# Supplementary material for: Impact of Progerin Expression on Adipogenesis in Hutchinson—Gilford Progeria Skin-Derived Precursor Cells
Source: Cells. 2021 Jun 25;10(7):1598. doi: 10.3390/cells10071598 (PMC8306773; doi:10.3390/cells10071598)
Supplement: Supplementary file 1 [file cells-10-01598-s001.zip › cells-1274296-supplementary.pdf]

# Impact of Progerin Expression on Adipogenesis in Hutchinson-Gilford Progeria Skin-Derived Precursor Cells

Farah Najdi, Peter Krüger and Karima Djabali \*

Epigenetics of Aging, Department of Dermatology and Allergy, TUM school of Medicine, Technical University of Munich (TUM), 85748 Garching, Germany; Farah.najdi@tum.de (F.N.); Peter.krueger@tum.de (P.K.)

\* Correspondence: Karima Djabali, djabali@tum.de

## Supplementary Figures

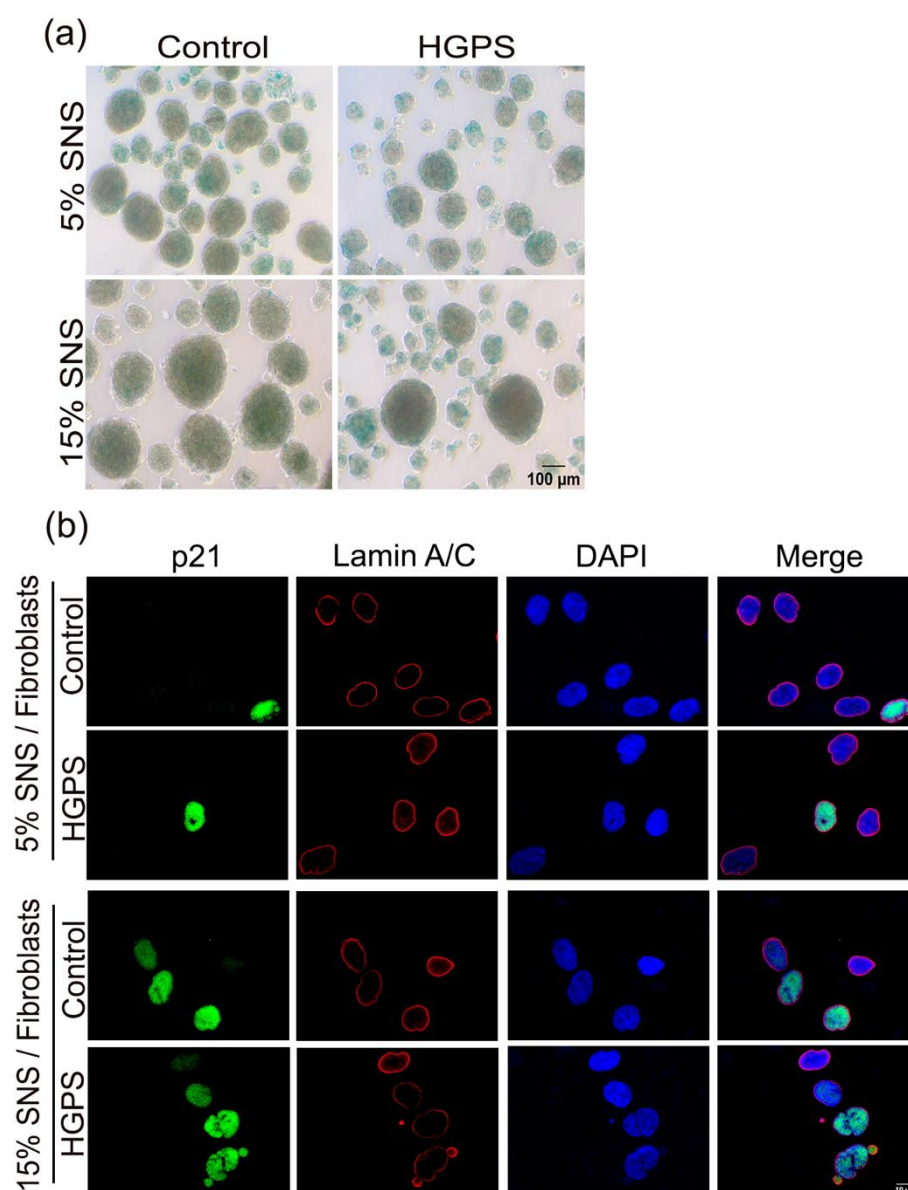

**Figure S1.** Senescence index of the SKPs: SA-β-gal staining of spheroids and p21 expression in original control and HGPS fibroblast cultures. (a) SA-β-gal test performed directly on the SKPs derived from control and HGPS SKPs starting from 5% and 15% SNS. (b) Immunofluorescence staining for p21 and lamin A/C in the initial control and HGPS fibroblast cultures with 5% and 15% SNS. Cells were counterstained with DAPI.

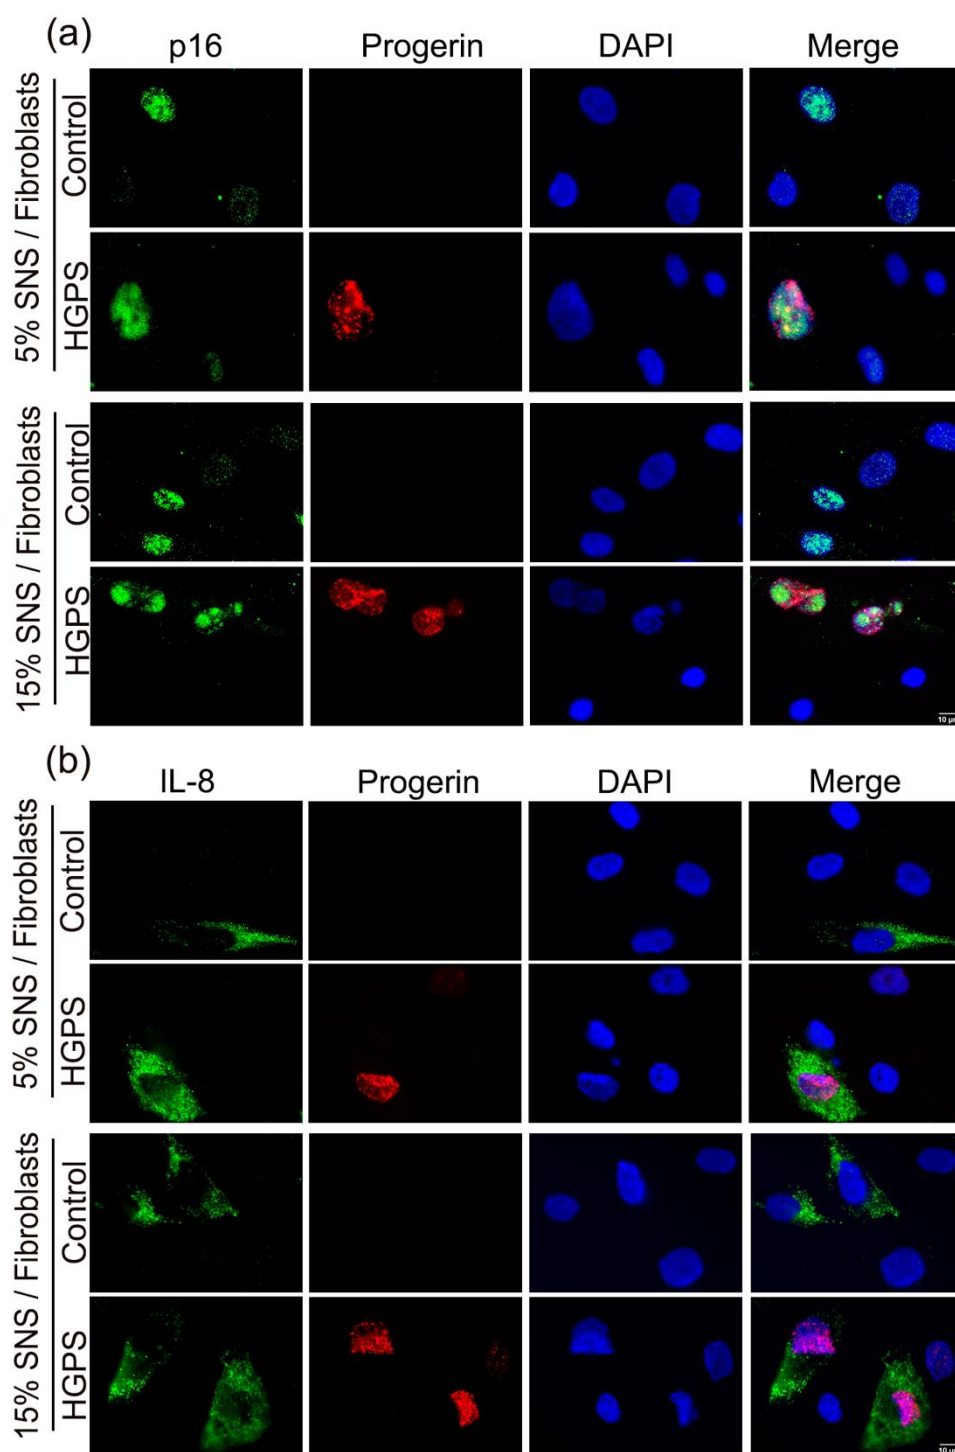

**Figure S2.** Immunofluorescence staining for p16 and IL-8 in original control and HGPS fibroblast cultures. **(a)** Immunofluorescence staining for p16 and progerin in initial fibroblast cultures from control and HGPS with 5% and 15% SNS. **(b)** Immunofluorescence staining for IL-8 and progerin in the initial fibroblast cultures from control and HGPS with 5% and 15% SNS. Cells were counterstained with DAPI.

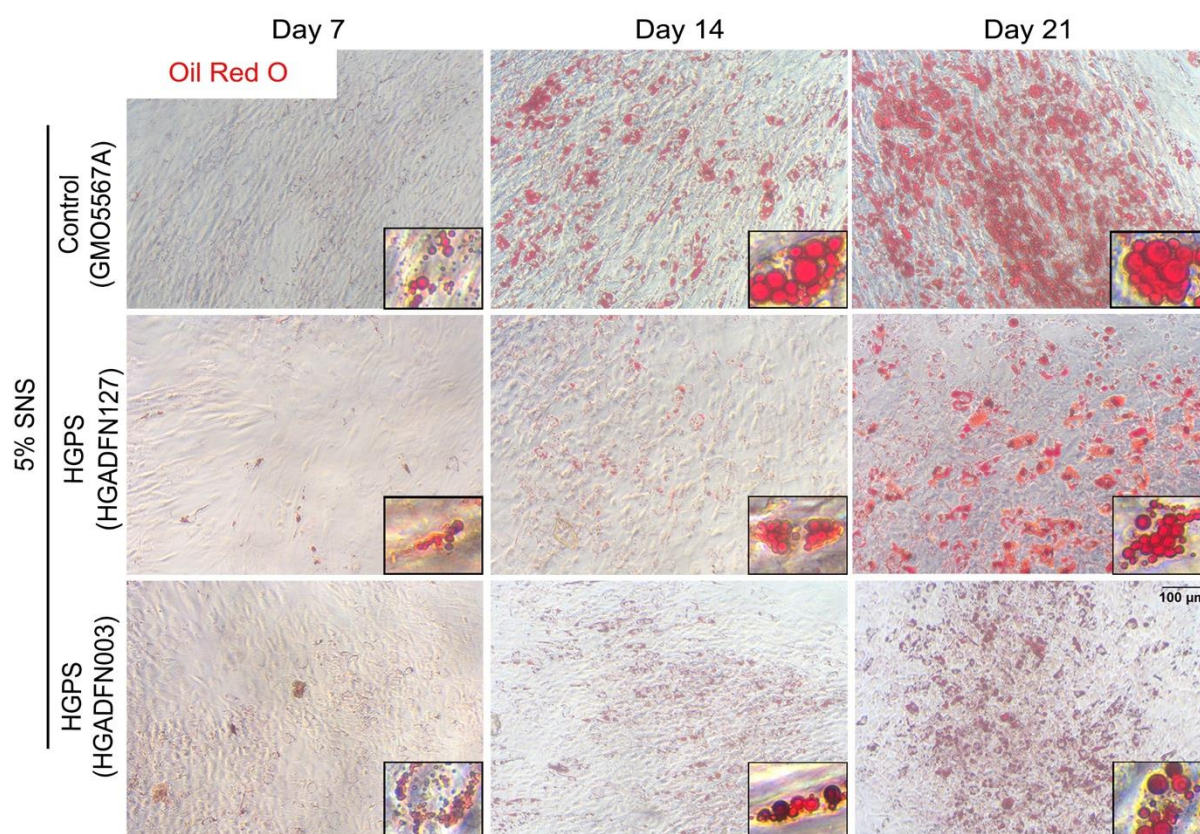

**Figure S3.** ORO staining of differentiated control and HGPS SKPs. ORO staining of control (GMO5567A) and HGPS (HGADFN127 and HGADFN003) differentiated adipocytes at days 7, 14 and 21 of adipogenesis, starting from 5% SNS

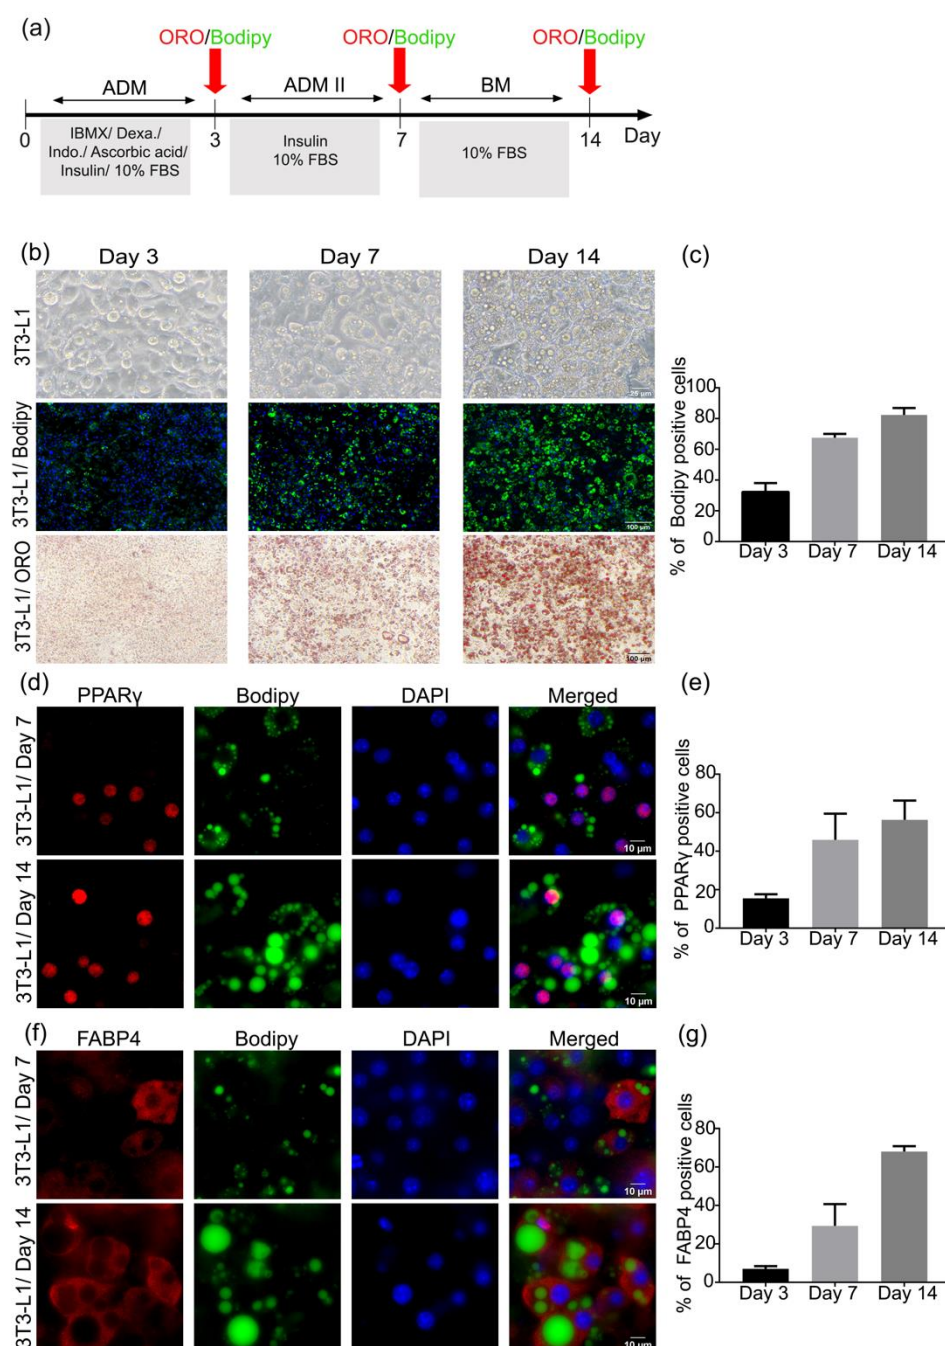

**Figure S4.** 3T3-L1 differentiation and expression of adipogenic markers. (a) Panel showing the pro-protocol for 3T3-L1 differentiation. After reaching confluence, the 3T3-L1 cells were cultured for 3 days in ADM, then replaced with ADM II containing DMEM, insulin and 10% FBS. At day 7, the media was replaced with BM containing DMEM and 10% FBS. The cells were maintained in BM till day 14 of differentiation. At days 3, day 7, and 14, the differentiated 3T3-L1 cells were fixed and stained with ORO and Bodipy. (b) First panel shows bright field microscopy images at days 3, 7, and 14 of 3T3-L1 adipogenic differentiation, scale bar: 25 μm. Second panel shows differentiated 3T3-L1 cells stained with Bodipy, scale bar: 100 μm. Third panel shows differentiated 3T3-L1 cells stained with ORO, scale bar: 100 μm. (c) Quantification of the percentage of Bodipy-positive 3T3-L1 differentiated cells. (d) Immunofluorescence showing dual signals for PPAR $\gamma$  and Bodipy in 3T3-L1 at day 7 and 14 of differentiation. (e) Quantification of the percentage of PPAR $\gamma$  positive cells at days 7 and 14 of differentiation in 3T3-L1 cells. (f) Immunofluorescence showing dual signals for FABP4 and Bodipy in 3T3-L1 cells on days 7 and 14 of differentiation. Cells were counter-stained with DAPI. (g) Quantification of percentage of FABP4 positive cells on days 7 and 14 of

---

adipogenic differentiation in 3T3-L1 cells. ADM: Adipocyte differentiation media, BM: Basal medium, IBMX: isobutylmethylxanthine, Dexa: dexamethasone, Indo.: indomethacine.
